# Supplementary material for: Probing the neutral graphene–ionic liquid interface: insights from molecular dynamics simulations
Source: Royal Society of Chemistry journal article supplement (doi:10.1039/c2cp22730d), 2012-01-01
Supplement: c2cp22730d.pdf [file c2cp22730d.pdf]

# Electronic Supplementary Information: Probing the neutral graphene-ionic liquid interface: insights from molecular dynamics simulations<sup>†</sup>

Maxim V Fedorov<sup>\*a</sup> and R. M. Lynden-Bell<sup>\*b‡</sup>

Received Xth XXXXXXXXXXXX 20XX, Accepted Xth XXXXXXXXXXXX 20XX

First published on the web Xth XXXXXXXXXXXX 200X

DOI: 10.1039/b000000x

The Electronic Supplementary Information contains: (i) graphical representation of the geometrical setup of the simulation box; (ii) plot of the electrostatic potential in z-direction near the wall.

## 1 Geometry of the Simulation Box

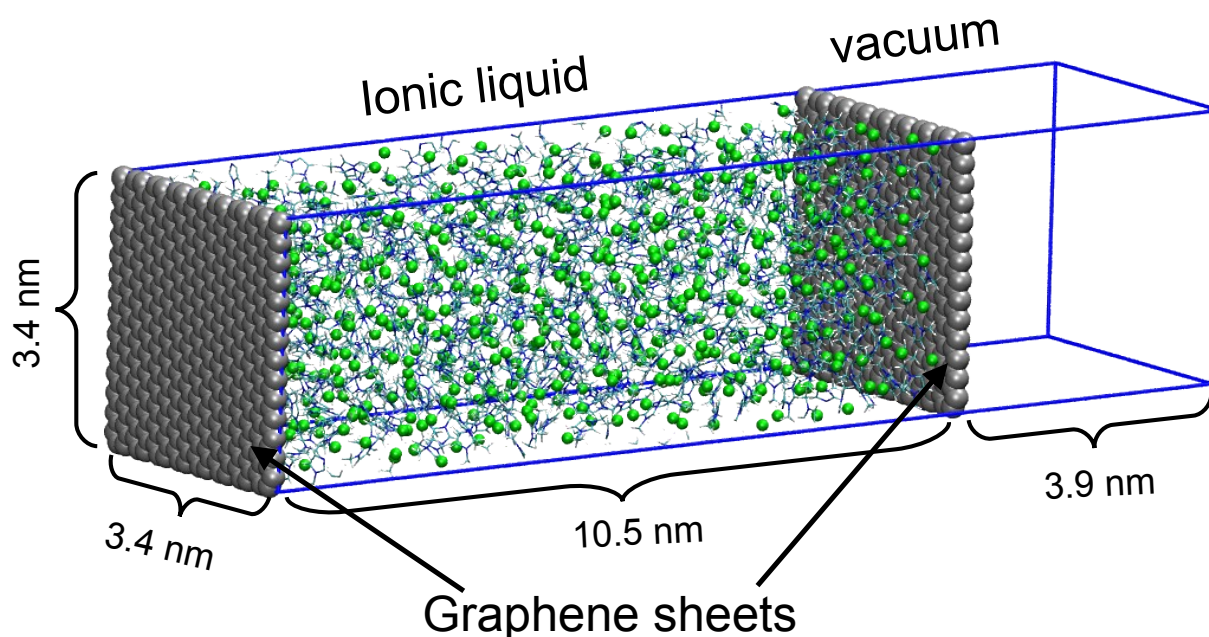

**Fig. 1** Geometrical setup of the simulation box.

<sup>a</sup>Max Planck Institute for Mathematics in the Sciences, Inselstrasse 22, Leipzig 04103, Germany. Fax: +49 341 9959 999; Tel: +49 341 9959 804; E-mail: fedorov@mis.mpg.de

<sup>b</sup>University of Cambridge, University Chemical Laboratory, Lensfield Road, Cambridge CB2 1EW. Tel: +44 1223 336535 E-mail: rmlb@cam.ac.uk

## 2 Electrostatic Potential at the Wall

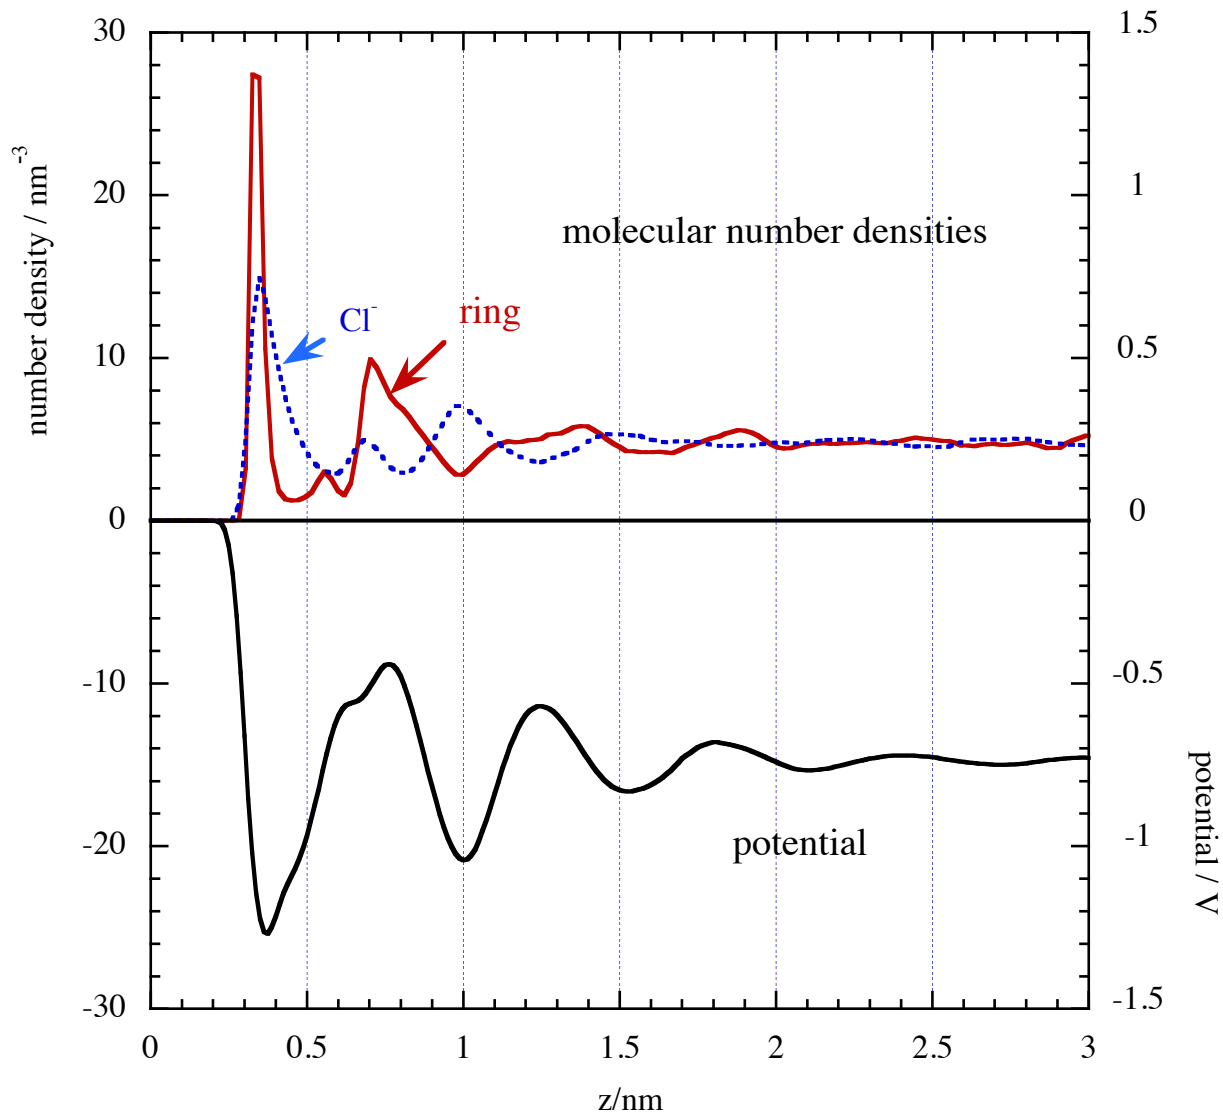

**Fig. 2** The interfacial number densities of [dmim][Cl] cations (red) and anions (blue). The electrostatic potential in the direction perpendicular to the wall ( $z$ -direction) is shown by black below the density curves (the corresponding ordinate is on the right side of the plot).
